# Supplementary material
Source: PubMed Central journal article supplement (PMC2559948)

Supplementary Figure 1.

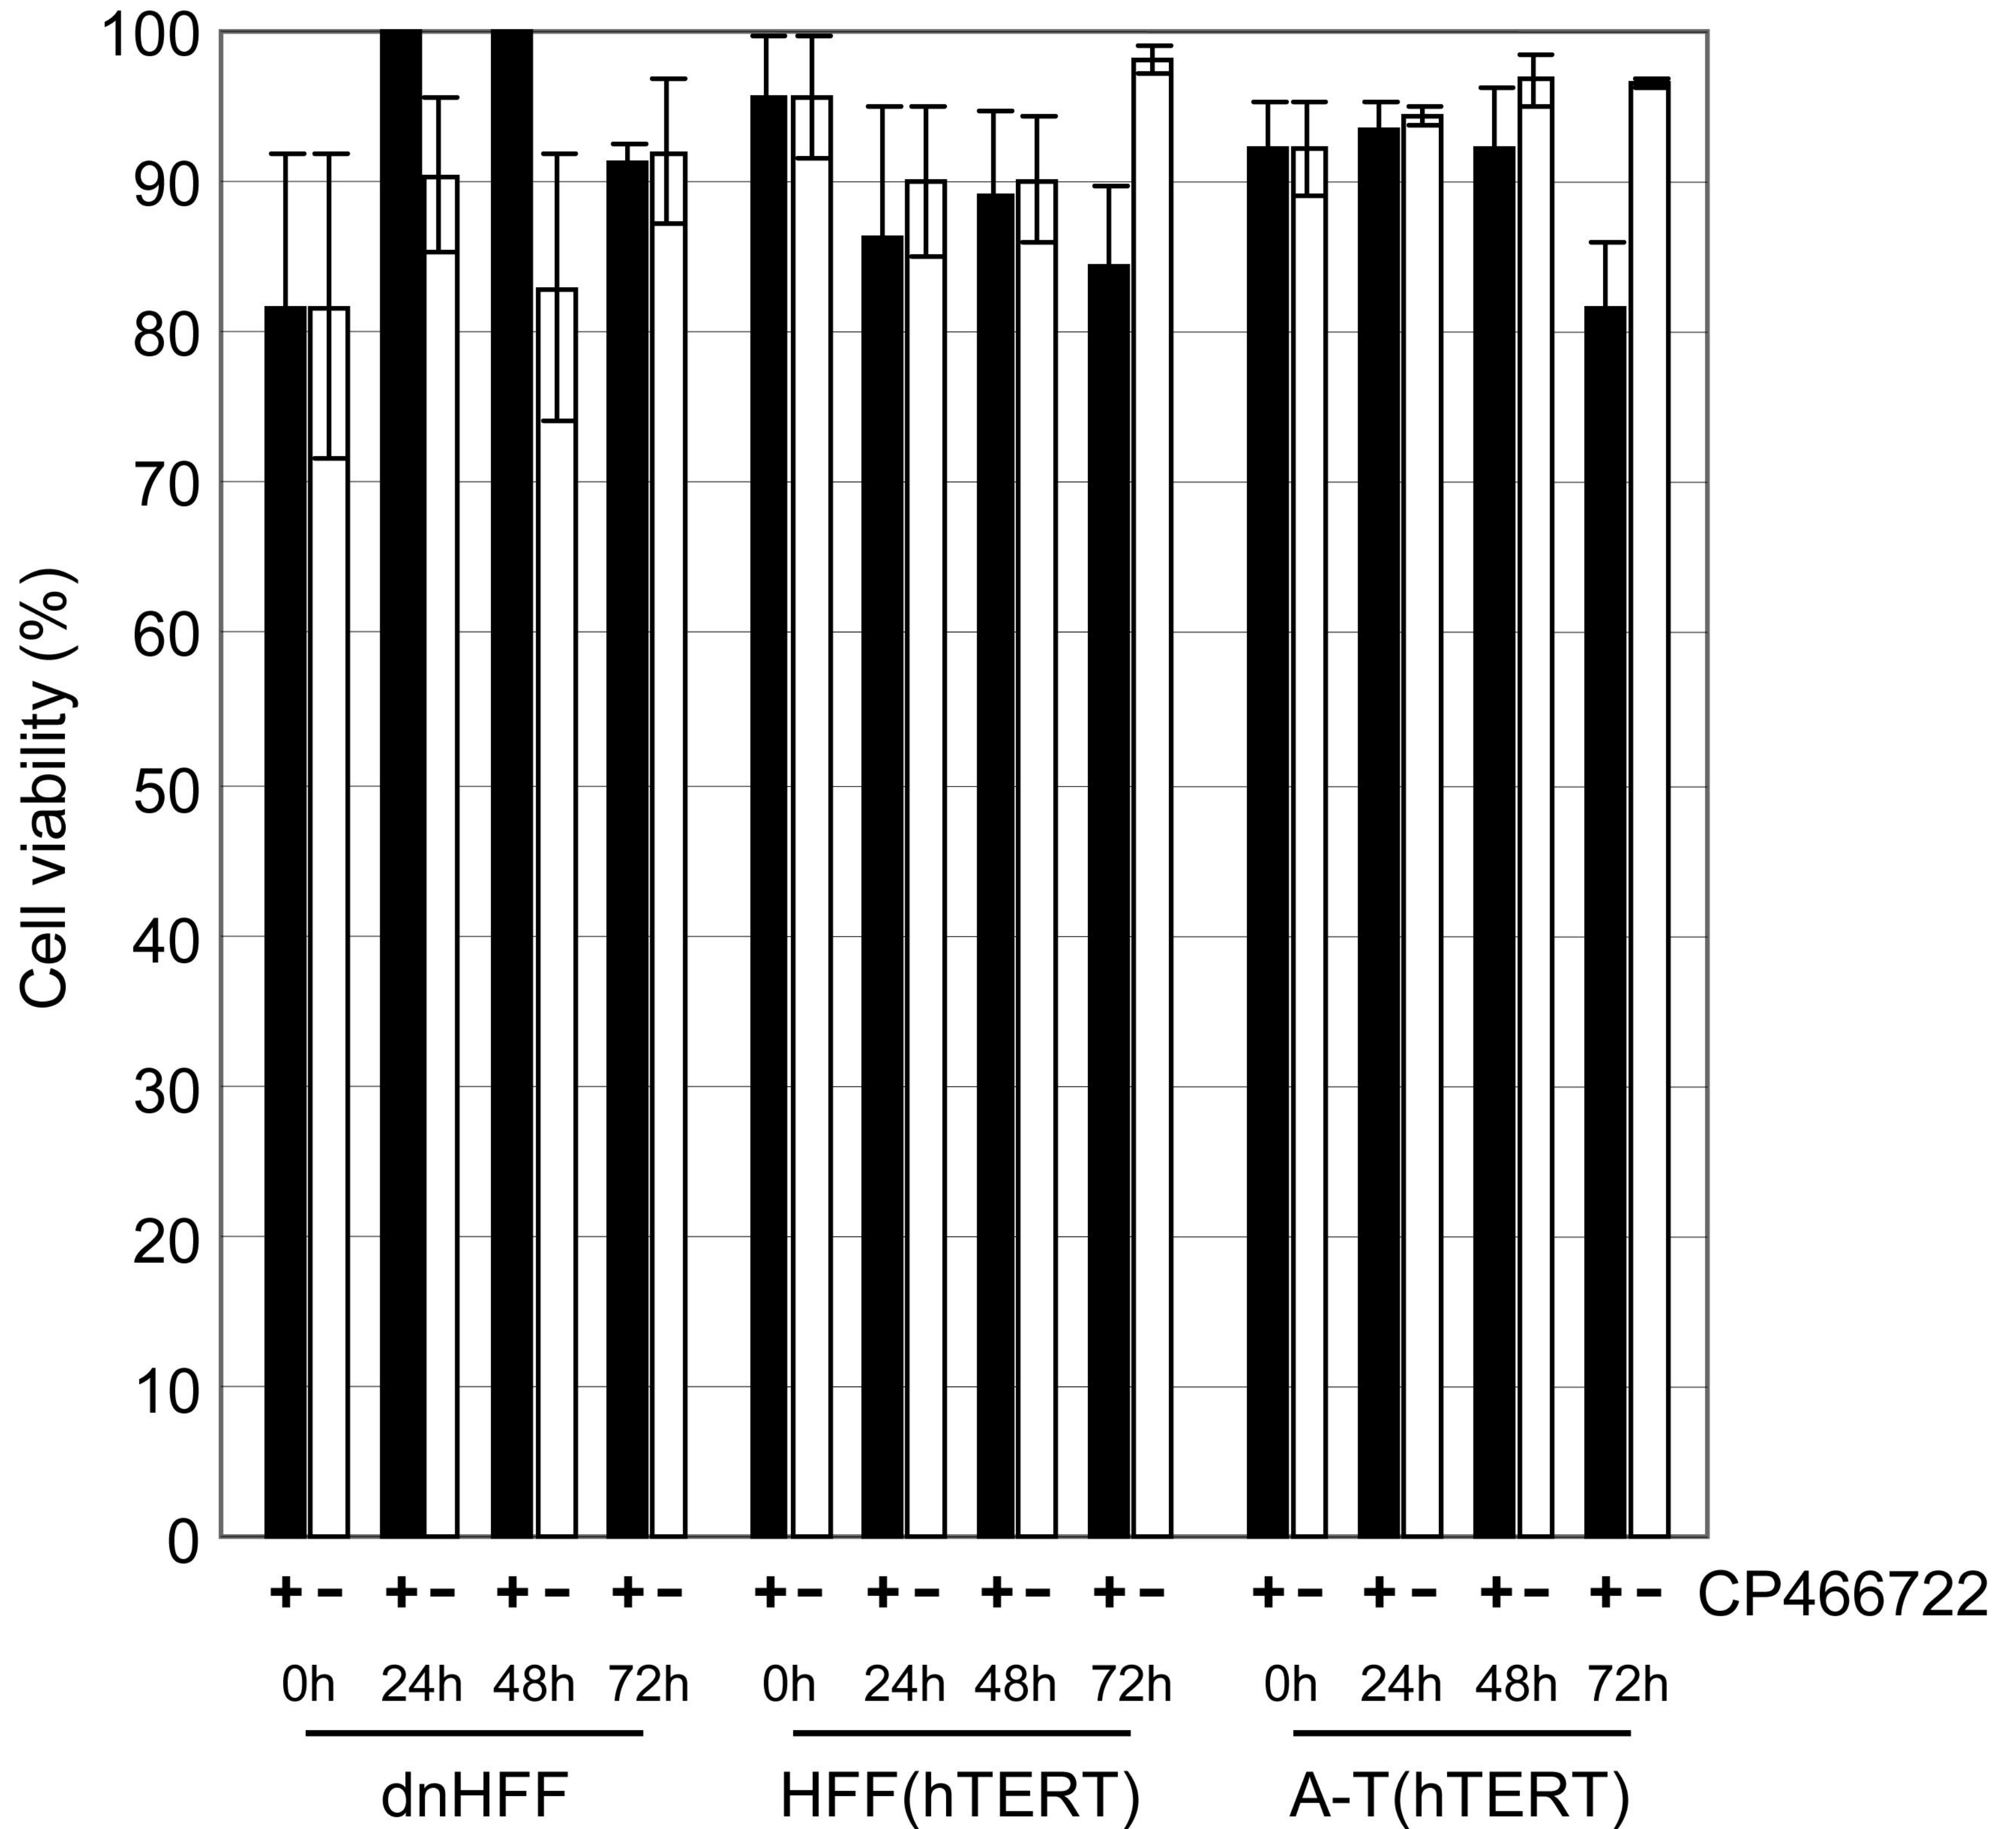

Supplement: NIHMS61127-supplement-fig_S1.pdf [file NIHMS61127-supplement-fig_S1.pdf]

# Supplementary Figure 2.

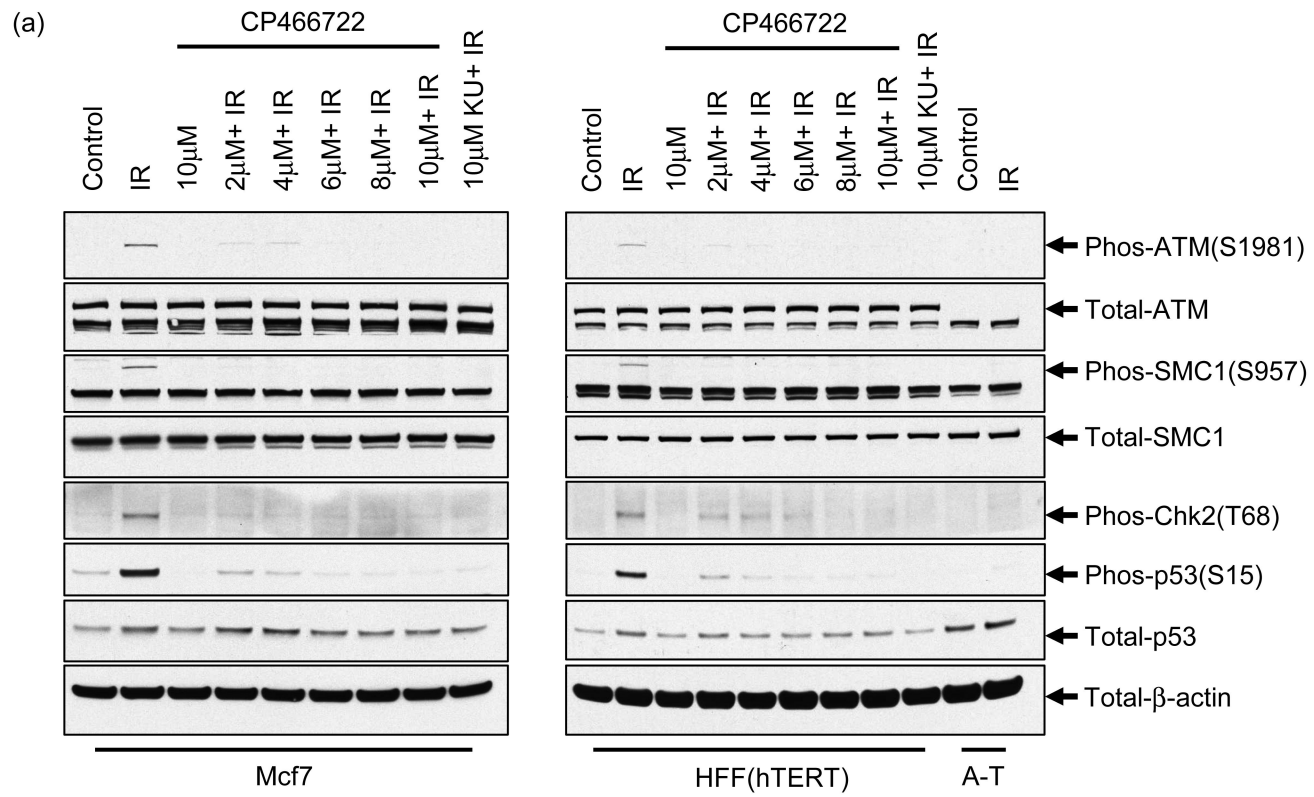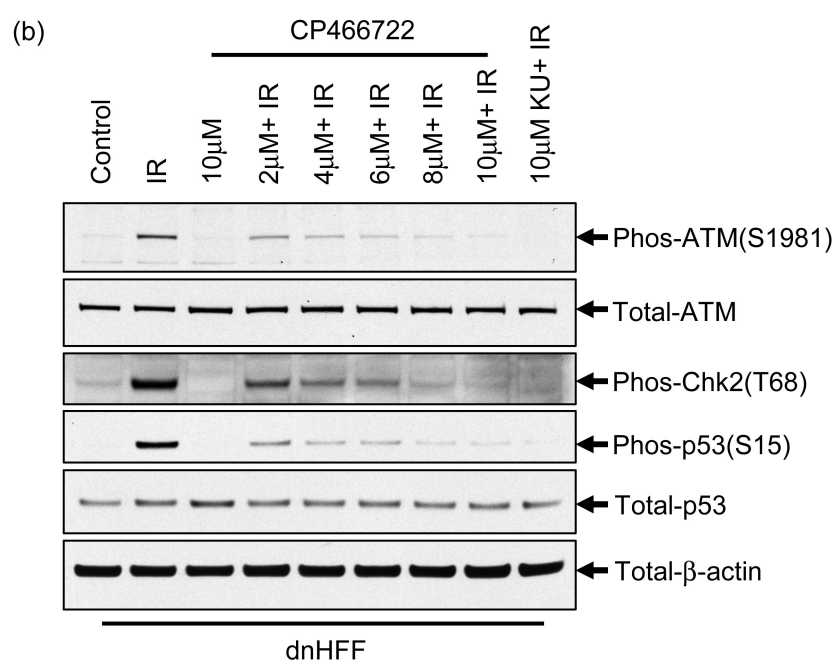

Supplement: NIHMS61127-supplement-fig_S2.pdf [file NIHMS61127-supplement-fig_S2.pdf]

Supplementary Figure 3.

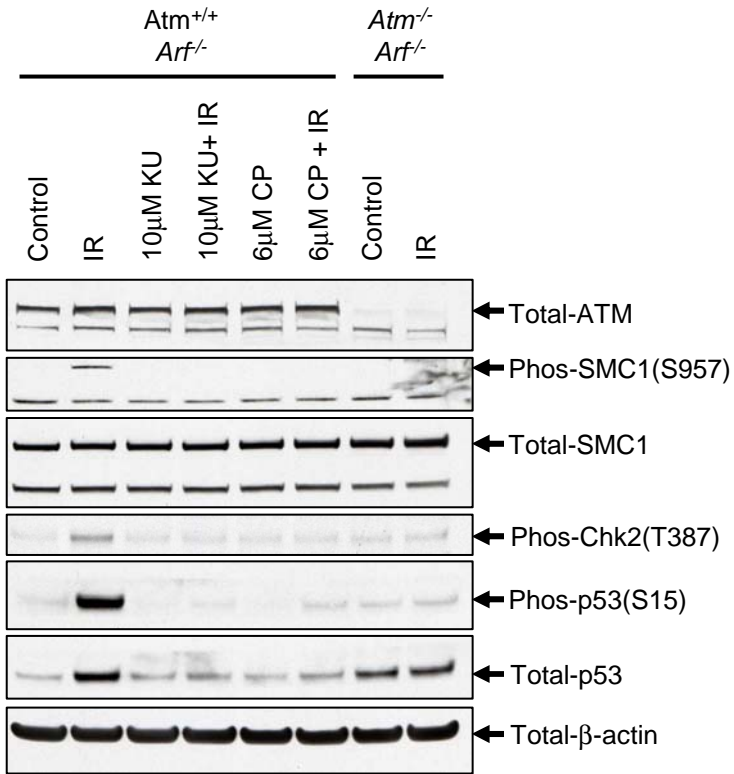

Supplement: NIHMS61127-supplement-fig_S3.pdf [file NIHMS61127-supplement-fig_S3.pdf]

# Supplementary Figure 4.

(a)

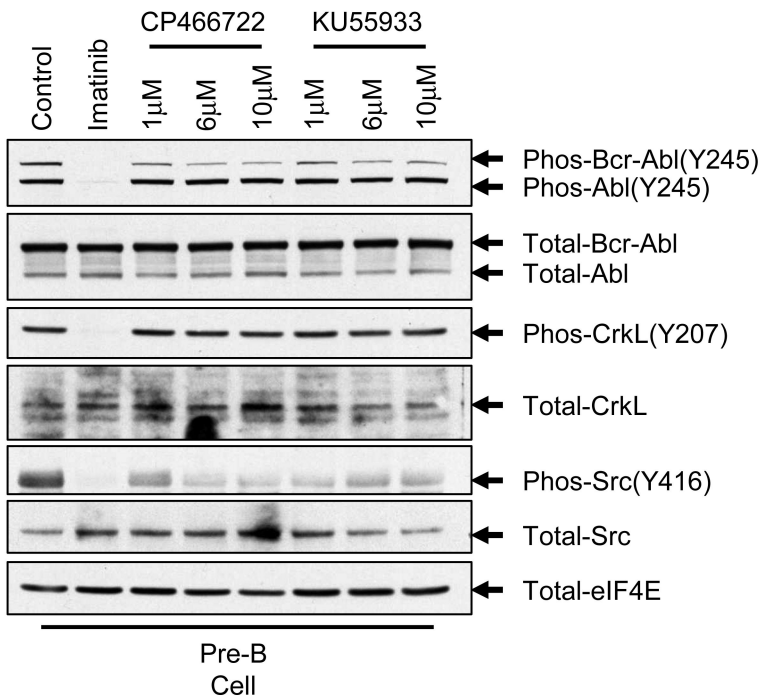

(b)

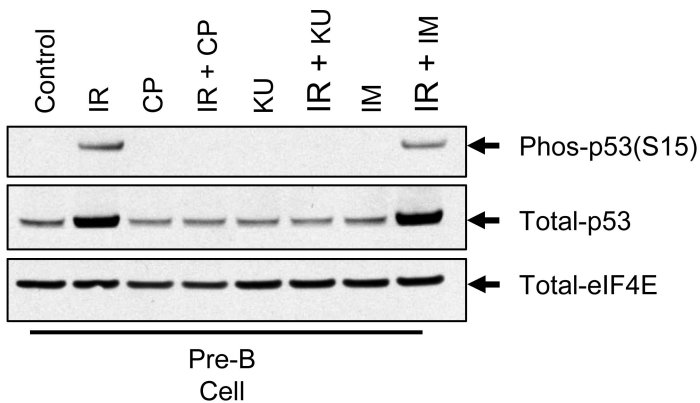

Supplement: NIHMS61127-supplement-fig_S4.pdf [file NIHMS61127-supplement-fig_S4.pdf]

**Supplementary Figure 5.**

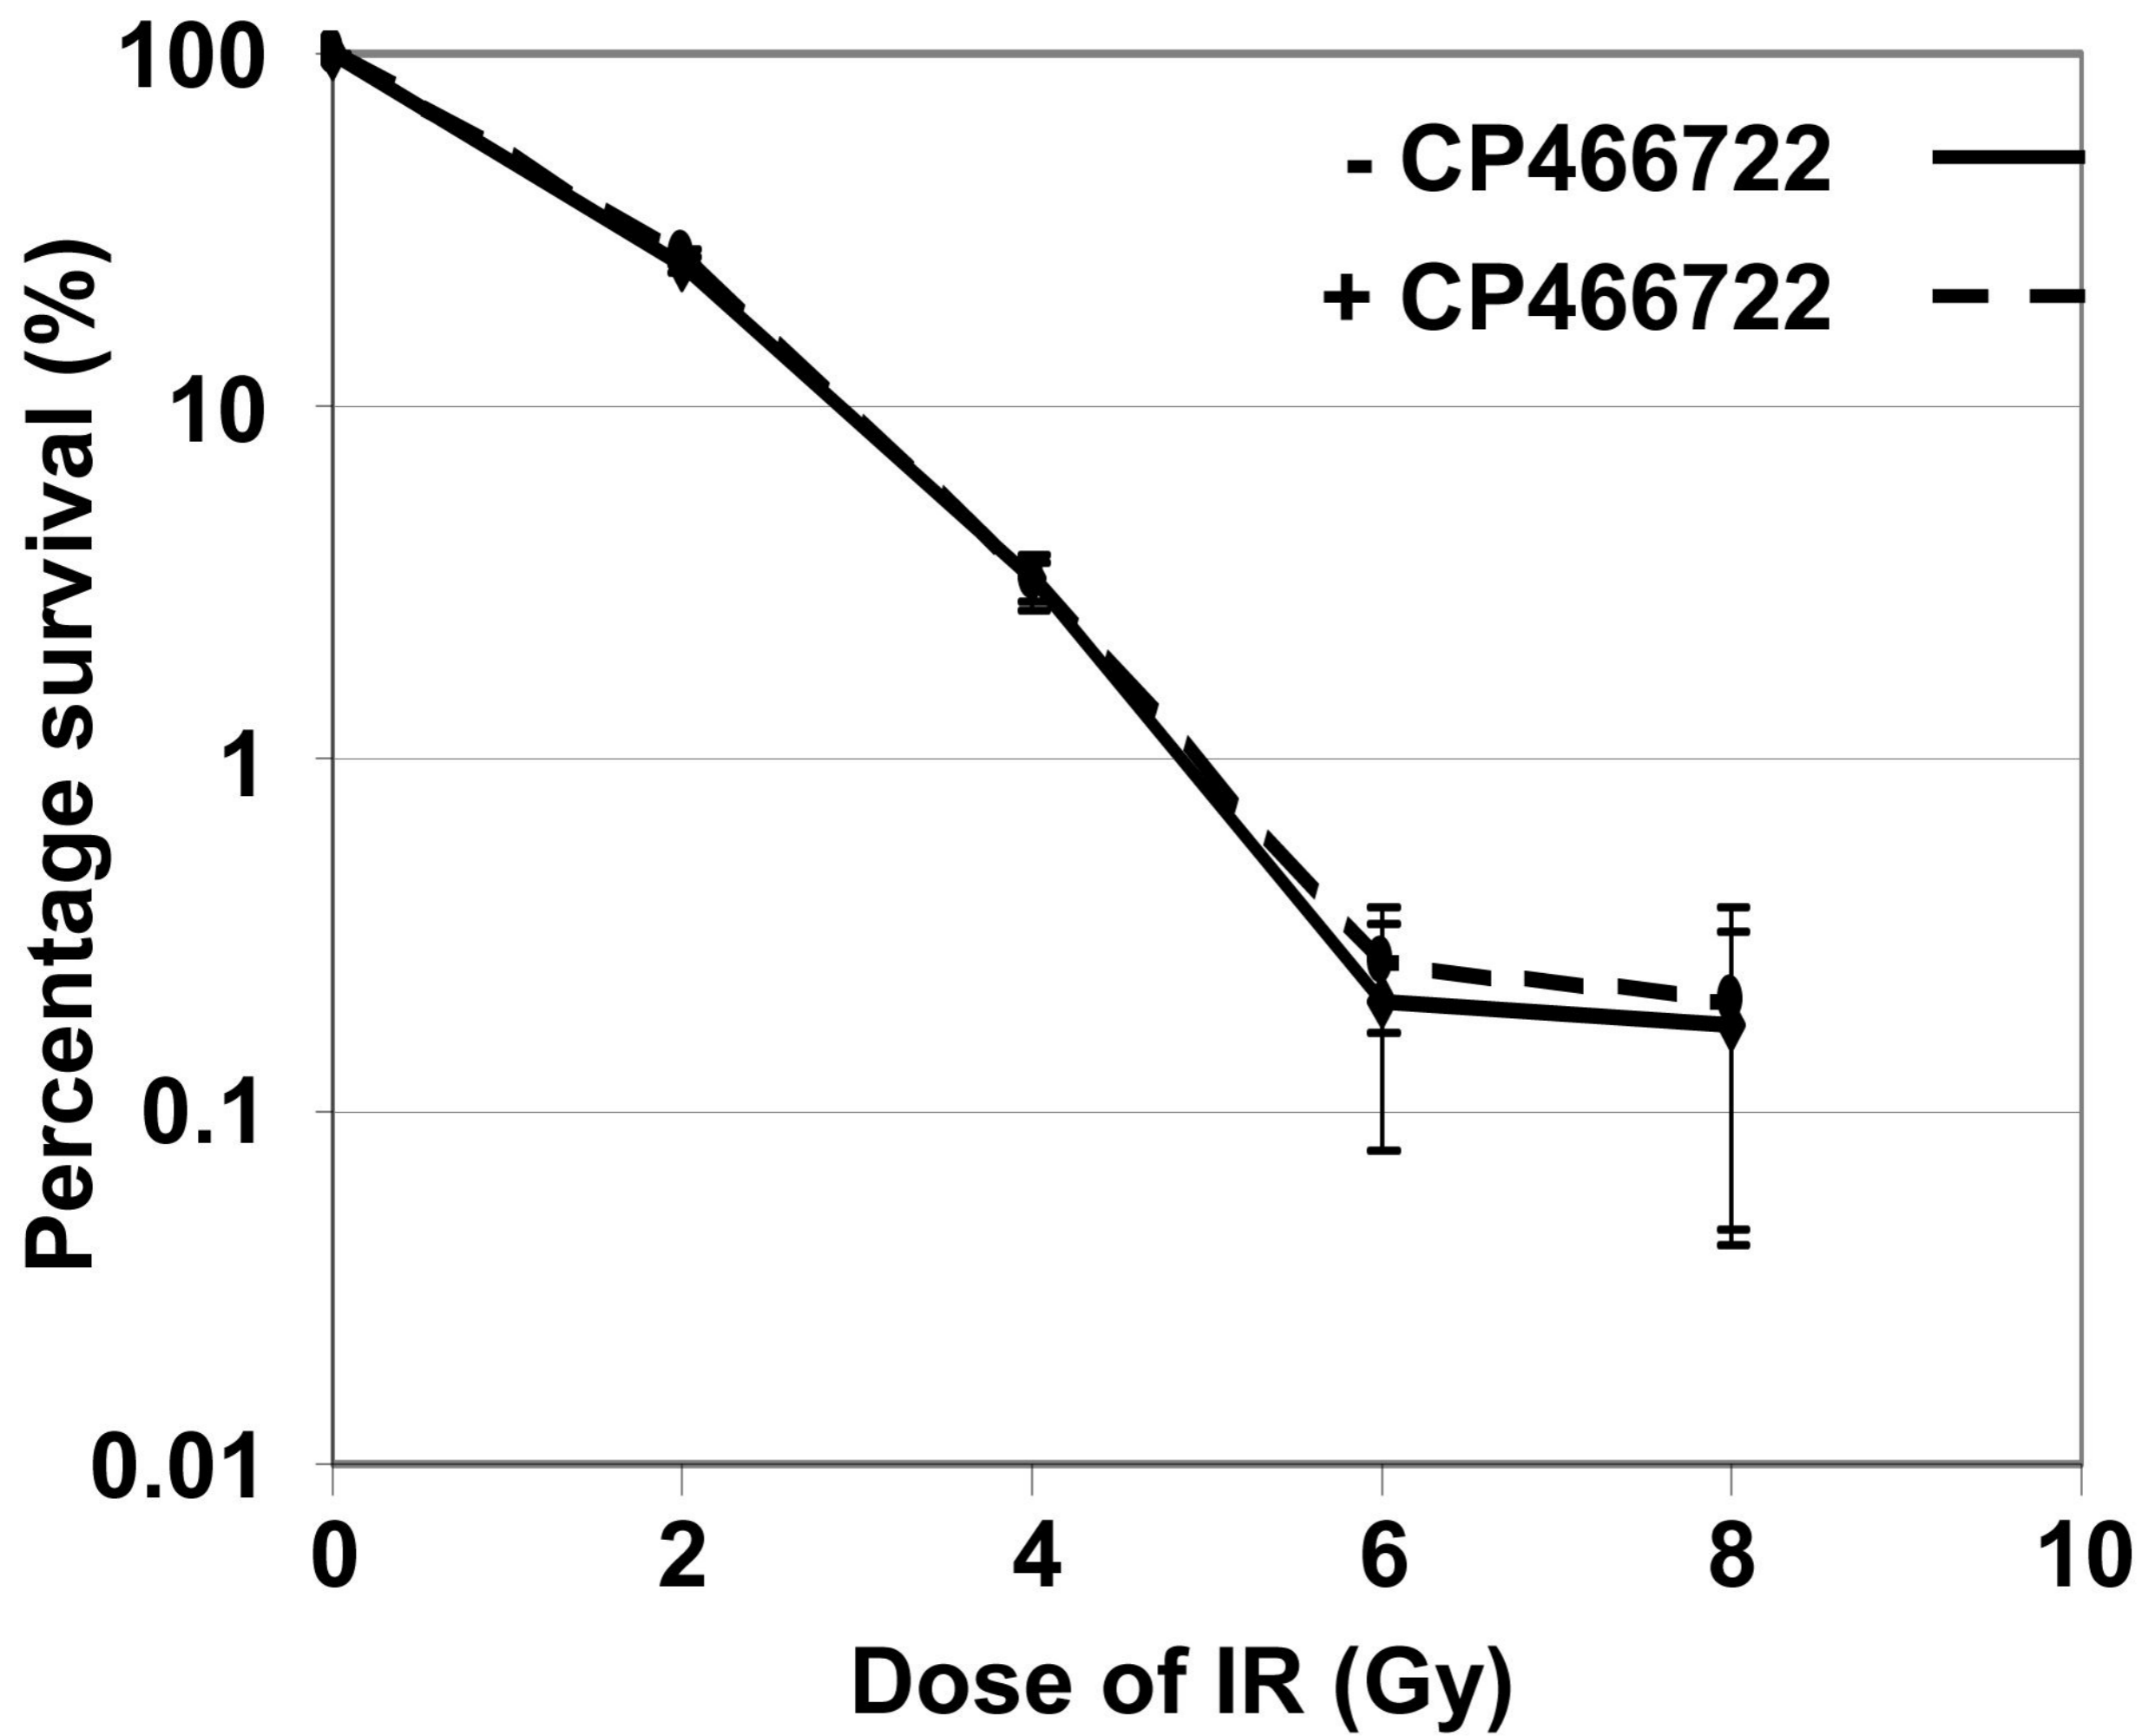

Supplement: NIHMS61127-supplement-fig_S5.pdf [file NIHMS61127-supplement-fig_S5.pdf]
